## Volume 17, 2006 Supplement 5

Gemcitabine: Ten Years of Clinical Experience  
19–21 September, 2005: Monastier di Treviso, Italy

|                                                                                                                                                                                                                                                                                                              |     |                                                                                                                                                                                                  |      |
|--------------------------------------------------------------------------------------------------------------------------------------------------------------------------------------------------------------------------------------------------------------------------------------------------------------|-----|--------------------------------------------------------------------------------------------------------------------------------------------------------------------------------------------------|------|
| Introduction<br><i>G. Cartei &amp; R. Labianca</i>                                                                                                                                                                                                                                                           | v5  | Neo-adjuvant chemotherapy in non-small cell lung cancer (NSCLC)<br><i>A. Santo, G. Genestreti, T. Sava, P. Manno, A. Terzi, A. M. Molino &amp; G. L. Cetto</i>                                   | v55  |
| <b>pharmacology and combinability of gemcitabine</b>                                                                                                                                                                                                                                                         |     | Current status of adjuvant chemotherapy in NSCLC<br><i>G. V. Scagliotti &amp; S. Novello</i>                                                                                                     | v62  |
| Cellular pharmacology of gemcitabine<br><i>E. Mini, S. Nobili, B. Caciagli, I. Landini &amp; T. Mazzei</i>                                                                                                                                                                                                   | v7  | First line chemotherapy in advanced or metastatic NSCLC<br><i>M. Rinaldi, C. Cauchi &amp; C. Gridelli</i>                                                                                        | v64  |
| Pharmacogenomics and gemcitabine<br><i>R. Rosell, M. Cobo, D. Isla, C. Camps &amp; B. Massuti</i>                                                                                                                                                                                                            | v13 | Second-line chemotherapy for non-small cell lung cancer<br><i>F. De Marinis, S. De Santis &amp; L. De Petris</i>                                                                                 | v68  |
| <i>In vitro</i> studies on gemcitabine combinations with other antineoplastic agents<br><i>E. Giovannetti, R. Danesi, V. Mey, S. Nannizzi, G. Pasqualetti &amp; M. Del Tacca</i>                                                                                                                             | v17 | Chemotherapy of advanced NSCLC in special patient population<br><i>C. Gridelli, P. Maione, A. Rossi, C. Guerriero, C. Ferrara, F. Del Gaizo, G. Colantuoni, D. Nicolella &amp; L. Napolitano</i> | v72  |
| <i>In vitro</i> basis for schedule-dependent interaction between gemcitabine and topoisomerase-targeted drugs in the treatment of colorectal cancer<br><i>S. N. Richter, G. Cartei, M. Nadai, A. Trestin, L. Barzon, M. Palumbo &amp; G. Palù</i>                                                            | v20 | Non-small-cell lung cancer: which platinum for gemcitabine?<br><i>C. Boni, F. Zanelli, M. Ambroggi &amp; A. Bologna</i>                                                                          | v79  |
| Topoisomerases I, II $\alpha$ and II $\beta$ mRNA expression in peripheral blood mononuclear cells of patients with solid tumor: preliminary results<br><i>G. Cartei, A. Trestin, E. Colombrino, M. Nadai, S. N. Richter, L. Barzon, G. Palù &amp; M. Palumbo</i>                                            | v25 | Non-platinum combination of gemcitabine in NSCLC<br><i>A. G. Favaretto</i>                                                                                                                       | v82  |
| Clinical studies of pemetrexed and gemcitabine combinations<br><i>A. A. Adjei</i>                                                                                                                                                                                                                            | v29 | Review of the pemetrexed and gemcitabine combination in patients with advanced-stage non-small cell lung cancer<br><i>C. Monnerat &amp; T. Le Chevalier</i>                                      | v86  |
| <b>thoracic cancer</b>                                                                                                                                                                                                                                                                                       |     | Novel targeted approaches in non-small cell lung cancer (NSCLC)<br><i>A. Ardizzoni &amp; M. Tiseo</i>                                                                                            | v91  |
| 10-year update on chemotherapy for non-small cell lung cancer<br><i>R. P. Abratt &amp; G. J. Hart</i>                                                                                                                                                                                                        | v33 | The surgeon and the oncologist in non-small cell lung cancer (NSCLC)<br><i>F. Sartori, L. Bortolotti, G. Marulli, G. Rizzardi, A. Favaretto, A. Zuin, C. Breda &amp; F. Rea</i>                  | v94  |
| Development of gemcitabine in non-small cell lung cancer: the Italian contribution<br><i>G. Metro, F. Cappuzzo, G. Finocchiaro, L. Toschi &amp; L. Crinò</i>                                                                                                                                                 | v37 | Chemotherapy advances in small cell lung cancer<br><i>G. Rosti, O. Carminati, M. Monti, S. Tamberi &amp; M. Marangolo</i>                                                                        | v99  |
| Simplified gemcitabine and platin regimen in patients with advanced or metastatic non-small cell lung cancer (NSCLC) to be proposed as neoadjuvant therapy<br><i>G. Cartei, S. Binato, C. Sacco, A. Bearz, S. Scalone, R. Ceravolo, S. Cingarlini, U. Fantoni, A. Palamidese, A. Iop &amp; E. Colombrino</i> | v47 | Pemetrexed and malignant pleural mesothelioma<br><i>M. Marangolo &amp; B. Vertogen</i>                                                                                                           | v103 |
| Chemo-radiotherapy in non-small cell lung cancer: the role of gemcitabine<br><i>L. Trodella, R. M. D'Angelillo, S. Ramella, F. Cellini, M. Ciresa, A. Cesario &amp; P. Granone</i>                                                                                                                           | v52 | <b>bladder and renal cancer</b>                                                                                                                                                                  |      |
|                                                                                                                                                                                                                                                                                                              |     | Challenges in the treatment of bladder cancer<br><i>D. S. Kaufman</i>                                                                                                                            | v106 |
|                                                                                                                                                                                                                                                                                                              |     | Gemcitabine in the treatment of advanced transitional cell carcinoma of the urothelium<br><i>J. Bellmunt, S. Albiol, A. Ramírez de Olano, J. Pujadas &amp; P. Maroto</i>                         | v113 |

Continued overleaf

Long-term survival results of a randomized trial comparing gemcitabine/cisplatin and methotrexate/vinblastine/ doxorubicin/cisplatin in patients with locally advanced and metastatic bladder cancer  
*J. T. Roberts, H. von der Maase, L. Sengeløv, P. F. Conte, L. Dogliotti, T. Oliver, M. J. Moore, A. Zimmermann & M. Arning*

v118

Actual experience and future development of gemcitabine in superficial bladder cancer  
*P. Gontero & B. Frea*

v123

Adjuvant chemotherapy of bladder cancer  
*F. Boccardo & L. Palmeri*

v129

A phase II study of Gemcitabine and immunotherapy in renal cancer: preliminary results and review of the literature  
*F. Zustovich, G. Cartei, M. Dal Bianco, L. De Zorzi, R. Ceravolo, S. Zovato, F. Salmaso, S. Binato, G. Artioli, S. Cingarlini & D. Pastorelli*

v133

### **gastrointestinal tumors**

Challenges in the treatment of gastrointestinal tumours  
*R. Labianca, E. Berardi & F. Malugani*

v137

Pharmacokinetic evaluation of gemcitabine and 2',2'-difluorodeoxycytidine-5'-triphosphate after prolonged infusion in patients affected by different solid tumors  
*L. Cattel, M. Airoidi, L. Delprino, R. Passera, P. Milla & F. Pedani*

v142

New target therapies in advanced pancreatic cancer  
*S. Cascinu, L. Verdecchia, N. Valeri, R. Berardi & M. Scartozzi*

v148

Gemcitabine and liposomal doxorubicin in biliary and hepatic carcinoma (HCC) chemotherapy: preliminary results and review of the literature

*D. Pastorelli, G. Cartei, F. Zustovich, F. Marchese, G. Artioli, S. Zovato, S. Binato, R. Ceravolo, S. Cingarlini, F. Salmaso, M. Mattiazzi, C. Sanavio, F. Farinati, G. Zanusi & U. Cillo*

v153

### **breast cancer**

Primary systemic therapy in operable breast cancer: clinical data and biological fall-out  
*M. Maur, V. Guarneri, A. Frassoldati & P. F. Conte*

v158

First line chemotherapy of metastatic breast cancer  
*P. Pronzato & M. Rondini*

v165

Gemcitabine: monochemotherapy of breast cancer  
*E. Ferrazzi & L. Stievano*

v169

Gemcitabine and taxanes in metastatic breast cancer  
*D. Amadori & L. Cecconetto*

v173

Biological agents and gemcitabine in the treatment of breast cancer  
*P. Morandi*

v177

### **ovarian cancer**

Challenges for chemotherapy in ovarian cancer  
*R. F. Ozols*

v181

Role of gemcitabine in ovarian cancer treatment  
*D. Lorusso, A. Di Stefano, F. Fanfani & G. Scambia*

v188

Gemcitabine and anthracyclines in platinumun-resistant ovarian cancer  
*E. Galligioni, C. Arcuri, R. Sorio & C. Griso*

v195

Multimodal approach to ovarian cancer  
*G. Scarfone & G. Bolis*

v199
